# Supplementary material for: Intensified immunosuppressive therapy in patients with immune checkpoint inhibitor-induced myocarditis
Source: PubMed Central journal article supplement (PMC7725077; doi:10.1136/jitc-2020-001887), 2020-12-08

# Intensified immunosuppressive therapy (IIST) in patients with immune checkpoint inhibitor-induced myocarditis

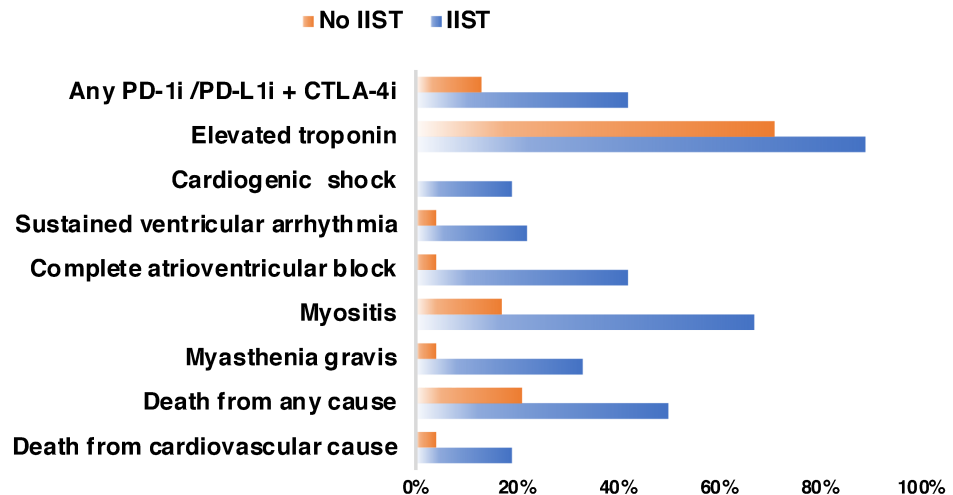

## Authors

Jennifer Cautela, Sarah Zerouh, Melanie Gaubert, Laurent Bonello, Marc Laine, Michael Peyrol, Franck Paganelli, Nathalie Lalevee, Fabrice Barlesi, Franck Thuny

## Correspondence

[franck.thuny@gmail.com](mailto:franck.thuny@gmail.com) from The Mediterranean University Centre of Cardio-Oncology, Aix Marseille University, France

## In Brief

The need for IIST was more common in patients who developed immune checkpoint inhibitor-induced (ICI) myocarditis very early after the start of ICI therapy, as well as when hemodynamic/electrical instability or neuromuscular adverse events occurred. Treatment with infliximab might be associated with an increased risk of cardiovascular death.

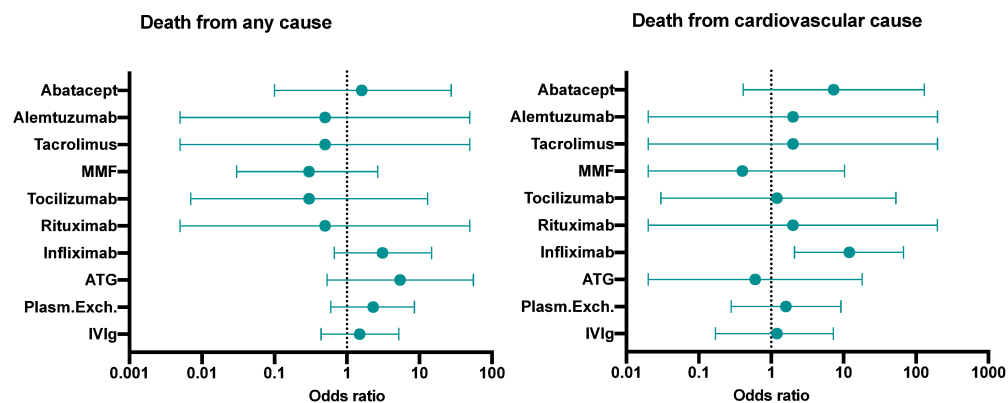

Supplement: jitc-2020-001887supp002.pdf [file jitc-2020-001887supp002.pdf]
